# Supplementary material for: Characterization of Four Complete Mitogenomes of Monolepta Species and Their Related Phylogenetic Implications
Source: MDPI journal article supplement (doi:10.3390/insects15010050), 2024-01-11
Supplement: s1 [file s1]

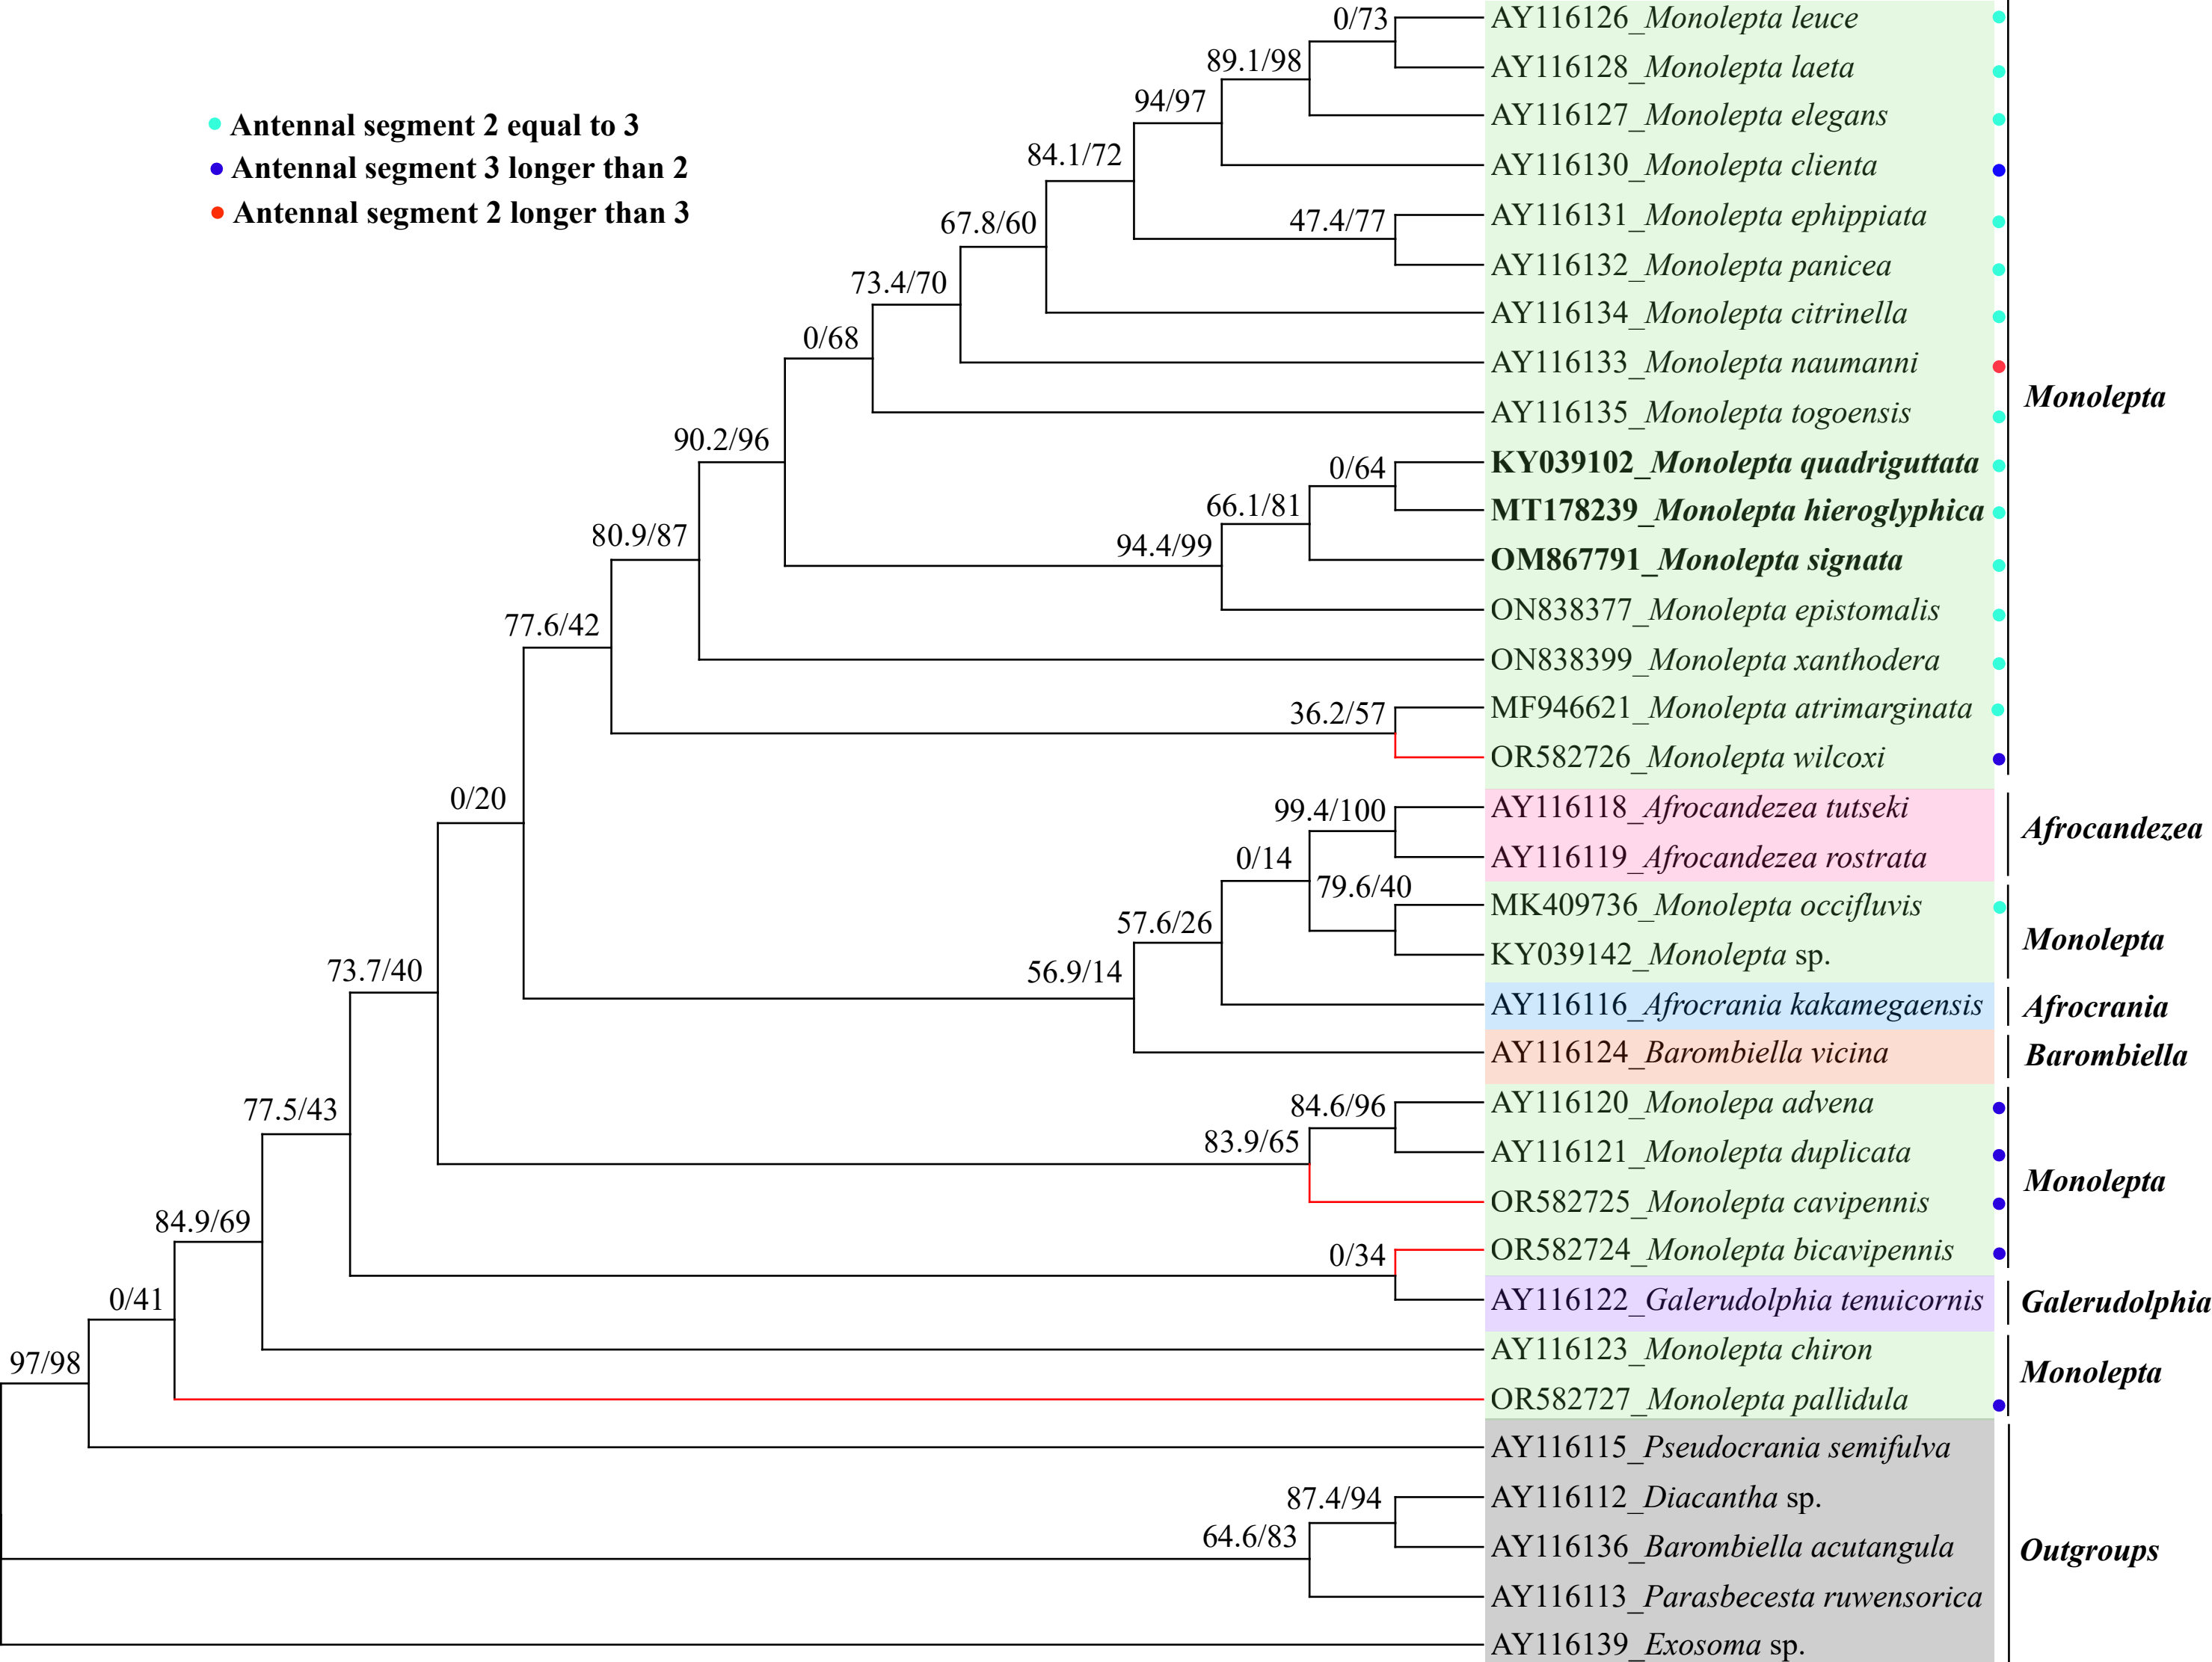

**Figure S1.** Phylogenetic tree reconstructed with IQ-TREE method based on *NDI* gene (34 species) under MFP + MERGE model. Newly sequenced species in this study are highlighted in red color. The numbers above nodes in the tree are the SH-aLRT (left) and bootstrap values (right). Tips of synonymous species are highlighted in black color. Different colored backgrounds represent the different genera or outgroups.
