# Supplementary material for: Characterization of Four Complete Mitogenomes of Monolepta Species and Their Related Phylogenetic Implications
Source: MDPI journal article supplement (doi:10.3390/insects15010050), 2024-01-11
Supplement: s1 [file s1]

**Table S2.** Organization of four newly sequenced mitogenomes of *Monolepta*.1. Organization of *Monolepta bicavipennis*.

| Gene              | Start | End   | Strand | Length(bp) | Intergenic<br>nucleotides | Start/stop<br>codons |
|-------------------|-------|-------|--------|------------|---------------------------|----------------------|
| <i>trnI</i>       | 1     | 77    | J      | 77         | -                         |                      |
| <i>trnQ</i>       | 78    | 140   | N      | 63         | 0                         |                      |
| <i>trnM</i>       | 140   | 207   | J      | 68         | -1                        |                      |
| <i>nad2</i>       | 208   | 1221  | J      | 1014       | 0                         | ATT/TAA              |
| <i>trnW</i>       | 1222  | 1275  | J      | 54         | 0                         |                      |
| <i>trnC</i>       | 1276  | 1337  | N      | 62         | 0                         |                      |
| <i>trnY</i>       | 1338  | 1401  | N      | 64         | 0                         |                      |
| <i>coxI</i>       | 1394  | 2941  | J      | 1548       | -8                        | ATT/TAA              |
| <i>trnL</i>       | 2942  | 3001  | J      | 60         | 0                         |                      |
| <i>cox2</i>       | 3002  | 3689  | J      | 688        | 0                         | ATT/T-               |
| <i>trnK</i>       | 3690  | 3759  | J      | 70         | 0                         |                      |
| <i>trnD</i>       | 3760  | 3824  | J      | 65         | 0                         |                      |
| <i>atp8</i>       | 3825  | 3980  | J      | 156        | 0                         | ATT/TAA              |
| <i>atp6</i>       | 3974  | 4648  | J      | 675        | -7                        | ATG/TAA              |
| <i>cox3</i>       | 4648  | 5437  | J      | 790        | -1                        | ATA/T-               |
| <i>trnG</i>       | 5439  | 5501  | J      | 63         | 1                         |                      |
| <i>nad3</i>       | 5502  | 5855  | J      | 354        | 0                         | ATT/TAG              |
| <i>trnA</i>       | 5854  | 5918  | J      | 65         | -2                        |                      |
| <i>trnR</i>       | 5919  | 5984  | J      | 66         | 0                         |                      |
| <i>trnN</i>       | 5980  | 6046  | J      | 67         | -5                        |                      |
| <i>trnS</i>       | 6047  | 6114  | J      | 68         | 0                         |                      |
| <i>trnE</i>       | 6115  | 6175  | J      | 61         | 0                         |                      |
| <i>trnF</i>       | 6176  | 6238  | N      | 63         | 0                         |                      |
| <i>nad5</i>       | 6239  | 7940  | N      | 1702       | 0                         | ATT/T-               |
| <i>trnH</i>       | 7941  | 8003  | N      | 63         | 0                         |                      |
| <i>nad4</i>       | 8004  | 9336  | N      | 1333       | 0                         | ATG/T-               |
| <i>nad4L</i>      | 9330  | 9611  | N      | 282        | -7                        | ATG/TAA              |
| <i>trnT</i>       | 9615  | 9678  | J      | 64         | 3                         |                      |
| <i>trnP</i>       | 9679  | 9745  | N      | 67         | 0                         |                      |
| <i>nad6</i>       | 9746  | 10243 | J      | 498        | 0                         | ATT/TAA              |
| <i>cytb</i>       | 10243 | 11382 | J      | 1140       | -1                        | ATG/TAG              |
| <i>trnS</i>       | 11383 | 11464 | J      | 82         | 0                         |                      |
| <i>nad1</i>       | 11465 | 12415 | N      | 951        | 0                         | TTG/TAG              |
| <i>trnL</i>       | 12417 | 12482 | N      | 66         | 1                         |                      |
| <i>rrnL</i>       | 12483 | 13755 | N      | 1273       | 0                         |                      |
| <i>trnV</i>       | 13756 | 13824 | N      | 69         | 0                         |                      |
| <i>rrnS</i>       | 13825 | 14629 | N      | 805        | 0                         |                      |
| AT-rich<br>region | 14630 | 16672 |        | 2043       | 0                         |                      |

## 2. Organization of *Monolepta cavipennis*.

| Gene              | Start | End   | Strand | Length(bp) | Intergenic<br>nucleotides | Start/stop<br>codons |
|-------------------|-------|-------|--------|------------|---------------------------|----------------------|
| <i>trnI</i>       | 1     | 103   | J      | 103        | -                         |                      |
| <i>trnQ</i>       | 104   | 172   | N      | 69         | 0                         |                      |
| <i>trnM</i>       | 170   | 242   | J      | 73         | -3                        |                      |
| <i>nad2</i>       | 243   | 1256  | J      | 1014       | 0                         | ATT/TAA              |
| <i>trnW</i>       | 1257  | 1311  | J      | 55         | 0                         |                      |
| <i>trnC</i>       | 1312  | 1373  | N      | 62         | 0                         |                      |
| <i>trnY</i>       | 1374  | 1438  | N      | 65         | 0                         |                      |
| <i>cox1</i>       | 1431  | 2978  | J      | 1548       | -8                        | ATT/TAA              |
| <i>trnL</i>       | 2979  | 3038  | J      | 60         | 0                         |                      |
| <i>cox2</i>       | 3040  | 3727  | J      | 688        | 1                         | ATT/T-               |
| <i>trnK</i>       | 3728  | 3797  | J      | 70         | 0                         |                      |
| <i>trnD</i>       | 3798  | 3859  | J      | 62         | 0                         |                      |
| <i>atp8</i>       | 3860  | 4015  | J      | 156        | 0                         | ATT/TAA              |
| <i>atp6</i>       | 4009  | 4683  | J      | 675        | -7                        | ATG/TAA              |
| <i>cox3</i>       | 4683  | 5469  | J      | 787        | -1                        | ATG/T-               |
| <i>trnG</i>       | 5471  | 5533  | J      | 63         | 1                         |                      |
| <i>nad3</i>       | 5534  | 5887  | J      | 354        | 0                         | ATC/TAG              |
| <i>trnA</i>       | 5886  | 5951  | J      | 66         | -2                        |                      |
| <i>trnR</i>       | 5952  | 6016  | J      | 65         | 0                         |                      |
| <i>trnN</i>       | 6012  | 6078  | J      | 67         | -5                        |                      |
| <i>trnS</i>       | 6079  | 6146  | J      | 68         | 0                         |                      |
| <i>trnE</i>       | 6147  | 6211  | J      | 65         | 0                         |                      |
| <i>trnF</i>       | 6212  | 6275  | N      | 64         | 0                         |                      |
| <i>nad5</i>       | 6276  | 7977  | N      | 1702       | 0                         | ATT/T-               |
| <i>trnH</i>       | 7978  | 8040  | N      | 63         | 0                         |                      |
| <i>nad4</i>       | 8041  | 9373  | N      | 1333       | 0                         | ATG/T-               |
| <i>nad4L</i>      | 9367  | 9648  | N      | 282        | -7                        | ATG/TAA              |
| <i>trnT</i>       | 9652  | 9717  | J      | 66         | 3                         |                      |
| <i>trnP</i>       | 9718  | 9783  | N      | 66         | 0                         |                      |
| <i>nad6</i>       | 9784  | 10281 | J      | 498        | 0                         | ATT/TAA              |
| <i>cytb</i>       | 10281 | 11420 | J      | 1140       | -1                        | ATG/TAG              |
| <i>trnS</i>       | 11421 | 11502 | J      | 82         | 0                         |                      |
| <i>nad1</i>       | 11503 | 12453 | N      | 951        | 0                         | TTG/TAG              |
| <i>trnL</i>       | 12455 | 12520 | N      | 66         | 1                         |                      |
| <i>rrnL</i>       | 12521 | 13800 | N      | 1280       | 0                         |                      |
| <i>trnV</i>       | 13801 | 13871 | N      | 71         | 0                         |                      |
| <i>rrnS</i>       | 13872 | 14680 | N      | 809        | 0                         |                      |
| AT-rich<br>region | 14681 | 16965 |        | 2285       | 0                         |                      |

### 3. Organization of *Monolepta wilcoxi*.

| Gene              | Start | End   | Strand | Length(bp) | Intergenic<br>nucleotides | Start/stop<br>codons |
|-------------------|-------|-------|--------|------------|---------------------------|----------------------|
| <i>trnI</i>       | 1     | 103   | J      | 103        | -                         |                      |
| <i>trnQ</i>       | 117   | 185   | N      | 69         | 13                        |                      |
| <i>trnM</i>       | 183   | 254   | J      | 72         | -3                        |                      |
| <i>nad2</i>       | 255   | 1268  | J      | 1014       | 0                         | ATT/TAA              |
| <i>trnW</i>       | 1269  | 1324  | J      | 56         | 0                         |                      |
| <i>trnC</i>       | 1325  | 1386  | N      | 62         | 0                         |                      |
| <i>trnY</i>       | 1387  | 1450  | N      | 64         | 0                         |                      |
| <i>coxI</i>       | 1443  | 2990  | J      | 1548       | -8                        | ATT/TAA              |
| <i>trnL</i>       | 2991  | 3051  | J      | 61         | 0                         |                      |
| <i>cox2</i>       | 3052  | 3739  | J      | 688        | 0                         | ATT/T-               |
| <i>trnK</i>       | 3740  | 3809  | J      | 70         | 0                         |                      |
| <i>trnD</i>       | 3810  | 3872  | J      | 63         | 0                         |                      |
| <i>atp8</i>       | 3873  | 4028  | J      | 156        | 0                         | ATT/TAA              |
| <i>atp6</i>       | 4022  | 4696  | J      | 675        | -7                        | ATG/TAA              |
| <i>cox3</i>       | 4696  | 5482  | J      | 787        | -1                        | ATG/T-               |
| <i>trnG</i>       | 5484  | 5545  | J      | 62         | 1                         |                      |
| <i>nad3</i>       | 5546  | 5899  | J      | 354        | 0                         | ATT/TAG              |
| <i>trnA</i>       | 5898  | 5963  | J      | 66         | -2                        |                      |
| <i>trnR</i>       | 5964  | 6029  | J      | 66         | 0                         |                      |
| <i>trnN</i>       | 6025  | 6091  | J      | 67         | -5                        |                      |
| <i>trnS</i>       | 6092  | 6159  | J      | 68         | 0                         |                      |
| <i>trnE</i>       | 6160  | 6220  | J      | 61         | 0                         |                      |
| <i>trnF</i>       | 6221  | 6282  | N      | 62         | 0                         |                      |
| <i>nad5</i>       | 6285  | 7986  | N      | 1702       | 2                         | ATT/T-               |
| <i>trnH</i>       | 7987  | 8049  | N      | 63         | 0                         |                      |
| <i>nad4</i>       | 8050  | 9382  | N      | 1333       | 0                         | ATG/T-               |
| <i>nad4L</i>      | 9376  | 9657  | N      | 282        | -7                        | ATG/TAA              |
| <i>trnT</i>       | 9661  | 9723  | J      | 63         | 3                         |                      |
| <i>trnP</i>       | 9724  | 9788  | N      | 65         | 0                         |                      |
| <i>nad6</i>       | 9789  | 10289 | J      | 501        | 0                         | ATT/TAA              |
| <i>cytb</i>       | 10289 | 11428 | J      | 1141       | -1                        | ATG/TAA              |
| <i>trnS</i>       | 11430 | 11511 | J      | 82         | 1                         |                      |
| <i>nad1</i>       | 11512 | 12462 | N      | 951        | 0                         | TTG/TAG              |
| <i>trnL</i>       | 12464 | 12528 | N      | 65         | 1                         |                      |
| <i>rrnL</i>       | 12529 | 13807 | N      | 1279       | 0                         |                      |
| <i>trnV</i>       | 13808 | 13878 | N      | 71         | 0                         |                      |
| <i>rrnS</i>       | 13879 | 14688 | N      | 810        | 0                         |                      |
| AT-rich<br>region | 14689 | 16012 |        | 1324       | 0                         |                      |

#### 4. Organization of *Monolepta pallidula*.

| Gene              | Start | End   | Strand | Length(bp) | Intergenic<br>nucleotides | Start/stop<br>codons |
|-------------------|-------|-------|--------|------------|---------------------------|----------------------|
| <i>trnI</i>       | 1     | 70    | J      | 70         | -                         |                      |
| <i>trnQ</i>       | 71    | 139   | N      | 69         | 0                         |                      |
| <i>trnM</i>       | 137   | 207   | J      | 71         | -3                        |                      |
| <i>nad2</i>       | 208   | 1221  | J      | 1014       | 0                         | ATT/TAA              |
| <i>trnW</i>       | 1222  | 1275  | J      | 54         | 0                         |                      |
| <i>trnC</i>       | 1276  | 1338  | N      | 63         | 0                         |                      |
| <i>trnY</i>       | 1339  | 1399  | N      | 61         | 0                         |                      |
| <i>cox1</i>       | 1398  | 2945  | J      | 1548       | -2                        | ATT/TAA              |
| <i>trnL</i>       | 2946  | 3005  | J      | 60         | 0                         |                      |
| <i>cox2</i>       | 3006  | 3693  | J      | 688        | 0                         | ATT/T-               |
| <i>trnK</i>       | 3694  | 3763  | J      | 70         | 0                         |                      |
| <i>trnD</i>       | 3764  | 3831  | J      | 68         | 0                         |                      |
| <i>atp8</i>       | 3832  | 3987  | J      | 156        | 0                         | ATT/TAA              |
| <i>atp6</i>       | 3981  | 4655  | J      | 675        | -7                        | ATG/TAA              |
| <i>cox3</i>       | 4655  | 5441  | J      | 787        | -1                        | ATG/T-               |
| <i>trnG</i>       | 5443  | 5505  | J      | 63         | 1                         |                      |
| <i>nad3</i>       | 5506  | 5859  | J      | 354        | 0                         | ATT/TAA              |
| <i>trnA</i>       | 5858  | 5924  | J      | 67         | -2                        |                      |
| <i>trnR</i>       | 5925  | 5989  | J      | 65         | 0                         |                      |
| <i>trnN</i>       | 5985  | 6051  | J      | 67         | -5                        |                      |
| <i>trnS</i>       | 6052  | 6119  | J      | 68         | 0                         |                      |
| <i>trnE</i>       | 6120  | 6180  | J      | 61         | 0                         |                      |
| <i>trnF</i>       | 6181  | 6244  | N      | 64         | 0                         |                      |
| <i>nad5</i>       | 6245  | 7946  | N      | 1702       | 0                         | ATT/T-               |
| <i>trnH</i>       | 7947  | 8012  | N      | 66         | 0                         |                      |
| <i>nad4</i>       | 8014  | 9346  | N      | 1333       | 1                         | ATG/T-               |
| <i>nad4L</i>      | 9340  | 9621  | N      | 282        | -7                        | ATG/TAA              |
| <i>trnT</i>       | 9625  | 9689  | J      | 65         | 3                         |                      |
| <i>trnP</i>       | 9690  | 9754  | N      | 65         | 0                         |                      |
| <i>nad6</i>       | 9755  | 10255 | J      | 501        | 0                         | ATT/TAA              |
| <i>cytb</i>       | 10255 | 11394 | J      | 1140       | -1                        | ATG/TAG              |
| <i>trnS</i>       | 11395 | 11476 | J      | 82         | 0                         |                      |
| <i>nad1</i>       | 11477 | 12427 | N      | 951        | 0                         | TTG/TAG              |
| <i>trnL</i>       | 12429 | 12494 | N      | 66         | 1                         |                      |
| <i>rrnL</i>       | 12495 | 13773 | N      | 1279       | 0                         |                      |
| <i>trnV</i>       | 13774 | 13844 | N      | 71         | 0                         |                      |
| <i>rrnS</i>       | 13845 | 14648 | N      | 804        | 0                         |                      |
| AT-rich<br>region | 14649 | 15866 |        | 1218       | 0                         |                      |
