# Supplementary material for: Characterization of Four Complete Mitogenomes of Monolepta Species and Their Related Phylogenetic Implications
Source: MDPI journal article supplement (doi:10.3390/insects15010050), 2024-01-11
Supplement: s1 [file s1]

**Table S1.** Samples and register gene information (*ND1* data).

| Taxa                             | Acc. No. | Collection place            | Ref.                        |
|----------------------------------|----------|-----------------------------|-----------------------------|
| <i>Afrocanthezea rostrata</i>    | AY116119 | Kenya (Kaimosi)             | Stapel <i>et al.</i> (2008) |
| <i>Afrocanthezea tutseki</i>     | AY116118 | Kenya(Kakamega Forest)      | Stapel <i>et al.</i> (2008) |
| <i>Afrocrania kakamagaensis</i>  | AY116116 | Kenya (Kakamega Forest)     | Stapel <i>et al.</i> (2008) |
| <i>Barombiella acutangula</i>    | AY116136 | Kenya (Kakamega Forest)     | Stapel <i>et al.</i> (2008) |
| <i>Barombiella vicina</i>        | AY116124 | Kenya (Kakamega Forest)     | Stapel <i>et al.</i> (2008) |
| <i>Diacantha</i> sp.             | AY116112 | Kenya (Teita Hills)         | Stapel <i>et al.</i> (2008) |
| <i>Exosoma</i> sp.               | AY116139 | Kenya (Teita Hills)         | Stapel <i>et al.</i> (2008) |
| <i>Galerudolphia tenuicornis</i> | AY116122 | Ivory Coast (Comoe NP)      | Stapel <i>et al.</i> (2008) |
| <i>Monolepta advena</i>          | AY116120 | Kenya (Teita Hills)         | Stapel <i>et al.</i> (2008) |
| <i>Monolepta citrinella</i>      | AY116134 | Kenya (Kakamega Forest)     | Stapel <i>et al.</i> (2008) |
| <i>Monolepta chiron</i>          | AY116123 | Kenya (Kakamega Forest)     | Stapel <i>et al.</i> (2008) |
| <i>Monolepta clienta</i>         | AY116130 | Ivory Coast (Comoe NP)      | Stapel <i>et al.</i> (2008) |
| <i>Monolepta deleta</i>          | AY116128 | Kenya (Mt. Kenya)           | Stapel <i>et al.</i> (2008) |
| <i>Monoleptoides duplicata</i>   | AY116121 | Kenya (Kakamega Forest)     | Stapel <i>et al.</i> (2008) |
| <i>Monolepta elegans</i>         | AY116127 | Kenya (Aberdare Mountains)  | Stapel <i>et al.</i> (2008) |
| <i>Monolepta ephippiata</i>      | AY116131 | Kenya (Mpala)               | Stapel <i>et al.</i> (2008) |
| <i>Monolepta leuce</i>           | AY116126 | Kenya (Aberdare Mountains)  | Stapel <i>et al.</i> (2008) |
| <i>Monolepta naumanni</i>        | AY116133 | Kenya (Kakamega Forest)     | Stapel <i>et al.</i> (2008) |
| <i>Monolepta panicea</i>         | AY116132 | Ivory Coast (Comoe NP)      | Stapel <i>et al.</i> (2008) |
| <i>Monolepta togoensis</i>       | AY116135 | Kenya (Kakamega Forest)     | Stapel <i>et al.</i> (2008) |
| <i>Parasbecesta ruwensorica</i>  | AY116113 | Kenya (Kakamega Forest)     | Stapel <i>et al.</i> (2008) |
| <i>Pseudocrania semifulva</i>    | AY116115 | Kenya (Kakamega Forest)     | Stapel <i>et al.</i> (2008) |
| <i>Monolepta atrimarginata</i>   | MF946621 | China, Guizhou, Zunyicity   | Nie <i>et al.</i> (2018)    |
| <i>Monolepta hieroglyphica</i>   | MT178239 | unknow                      | Jiang <i>et al.</i> (2019)  |
| <i>Monolepta occifluvis</i>      | MK409736 | unknow                      | unpublished                 |
| <i>Monolepta quadriguttata</i>   | KY039102 | unknow                      | Song <i>et al.</i> (2018)   |
| <i>Monolepta signata</i>         | OM867791 | unknow                      | unpublished                 |
| <i>Monolepta</i> sp.             | KY039142 | unknow                      | Song <i>et al.</i> (2018)   |
| <i>Monolepta bicavipennis</i>    | OR582724 | China, Shaanxi, Qinling     | this study                  |
| <i>Monolepta cavipennis</i>      | OR582725 | China, Hainan, Jianfengling | this study                  |
| <i>Monolepta wilcoxi</i>         | OR582726 | China, Guizhou, Zunyicity   | this study                  |
| <i>Monolepta pallidula</i>       | OR582727 | China, Anhui, Jinzhai       | this study                  |
| <i>Monolepta epistomalis</i>     | ON838377 | unknow                      | unpublished                 |
| <i>Monolepta xanthodera</i>      | ON838399 | unknow                      | unpublished                 |
